# Supplementary material for: Cyclic oligomers based on complementary Zn(ii) and Sn(iv)-porphyrins
Source: Royal Society of Chemistry journal article supplement (doi:10.1039/b902408p), 2009-01-01

## Cyclic Oligomers Based on Complementary Zn(II) and Sn(IV) Porphyrins

Gerald A. Metselaar, Pablo Ballester, Javier de Mendoza

Institute of Chemical Research of Catalonia (ICIQ) Av. Països Catalans, 16, 43007-Tarragona, Spain.

### Supporting Information

**Table S1.** Distances of protons to the metal porphyrins in the optimised cyclic assemblies.<sup>1</sup>

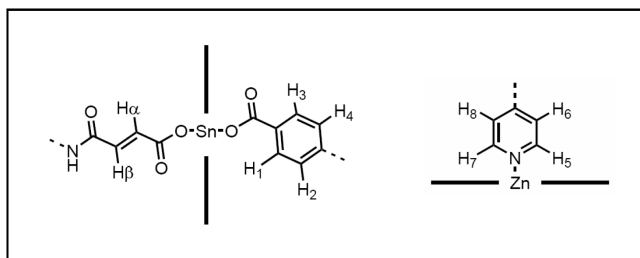

|                    | H <sub>α</sub> (Å) | H <sub>β</sub> (Å) | H <sub>1</sub> (Å) | H <sub>2</sub> (Å) | H <sub>3</sub> (Å) | H <sub>4</sub> (Å) | H <sub>5</sub> (Å) | H <sub>6</sub> (Å) | H <sub>7</sub> (Å) | H <sub>8</sub> (Å) |
|--------------------|--------------------|--------------------|--------------------|--------------------|--------------------|--------------------|--------------------|--------------------|--------------------|--------------------|
| [1·2] <sub>5</sub> | 5.02               | 4.32               | 3.48               | 5.56               | 5.57               | 7.72               | 2.35               | 4.76               | 2.42               | 4.84               |
| [1·2] <sub>6</sub> | 4.69               | 4.40               | 3.96               | 6.13               | 5.00               | 7.17               | 2.35               | 4.77               | 2.39               | 4.81               |

<sup>(1)</sup> Measured in the minimized models using Mercury 1.4.2 (build 2).

## NMR-Spectra

### 5,15-[bis(4-tolyl)]-10-(4-methylbenzoate)-20-(4-pyridyl)porphyrin (3)

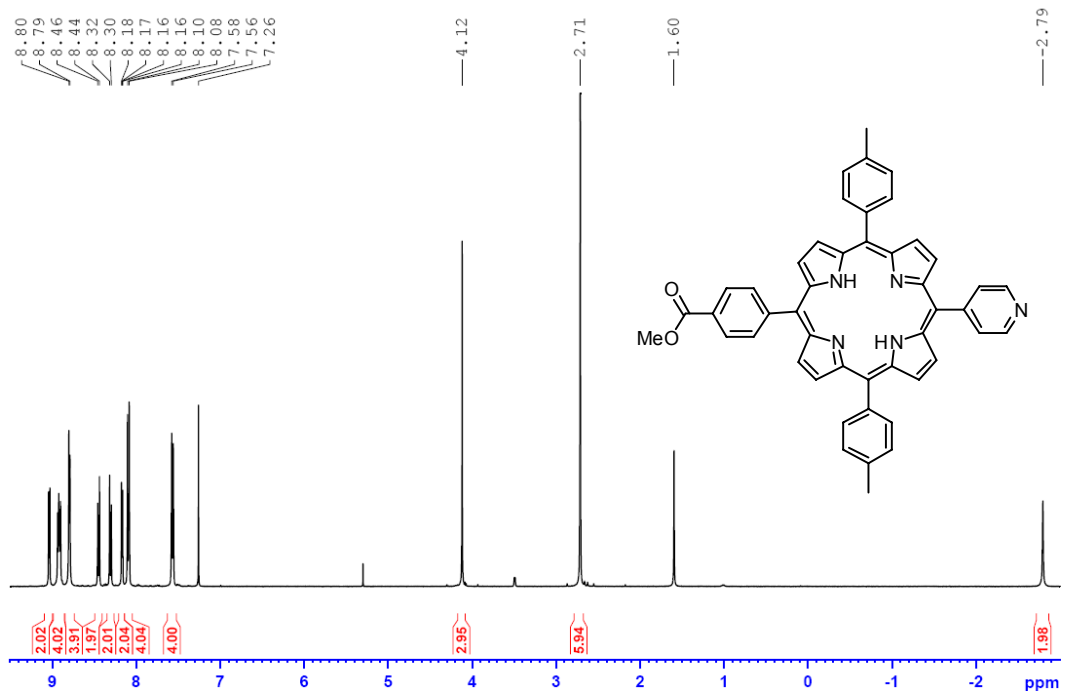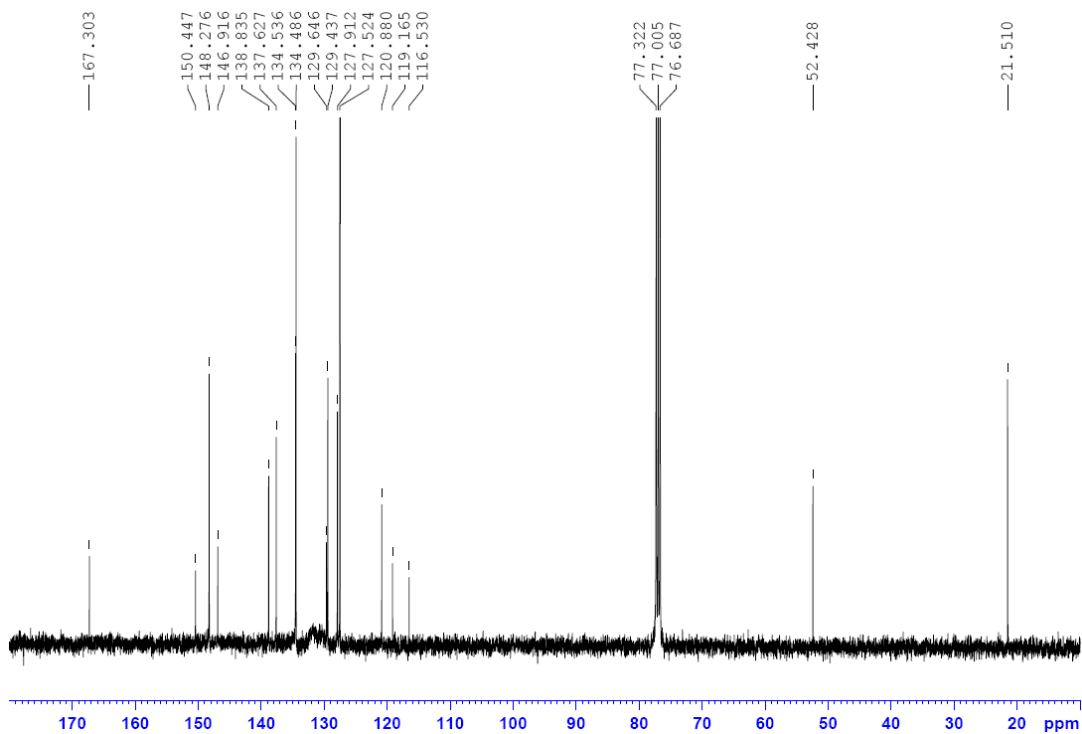

*5,15-[bis(4-tolyl)]-10-[4-(methoxycarbonylphenyl)]-20-(4-pyridyl) tin(IV)  
bishydroxyporphyrin (4)*

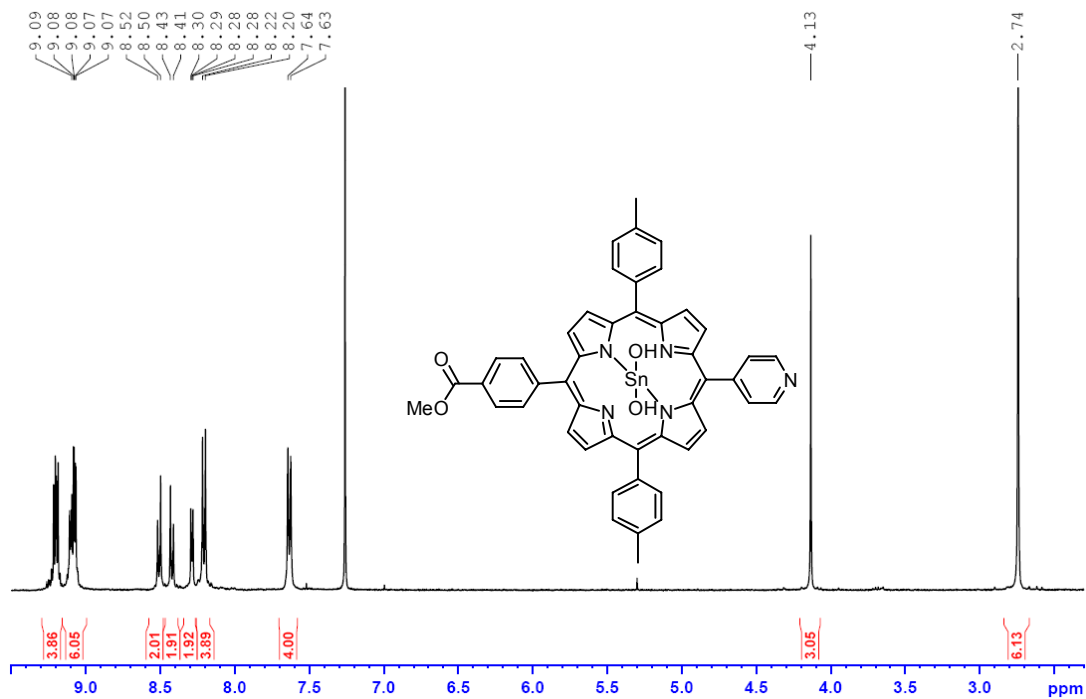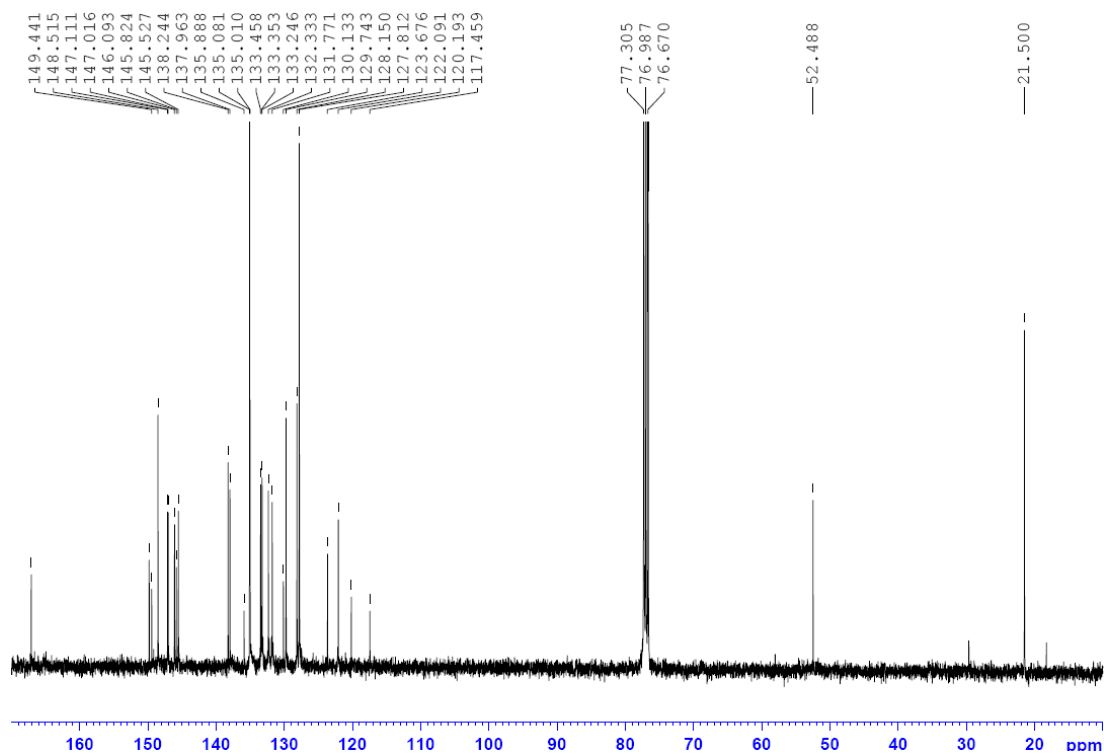

*5,10,15-[tris(4-tolyl)]-20-(3-nitrophenyl)porphyrin (5)*

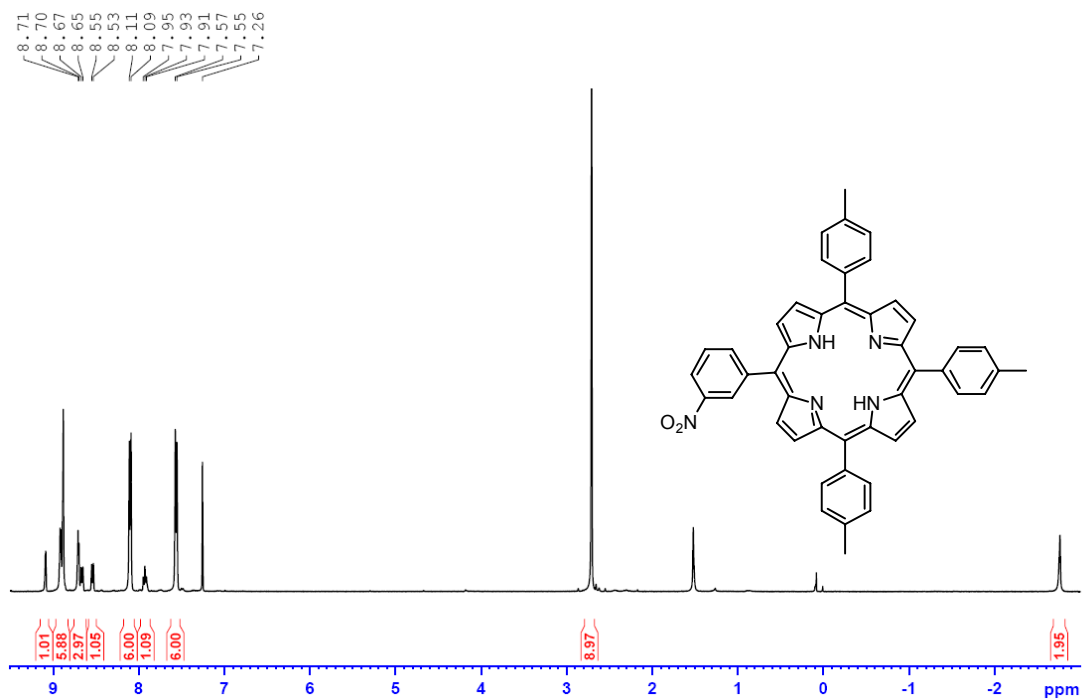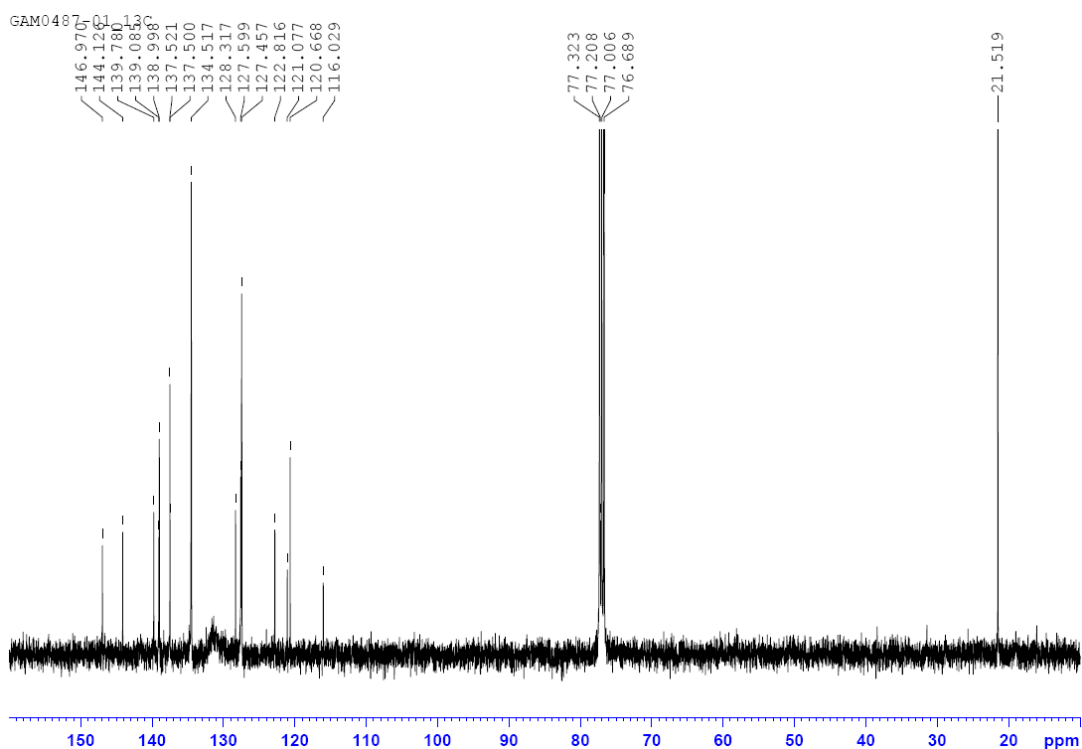

*5,10,15-[tris(4-tolyl)]-20-(3-aminophenyl)porphyrin (6)*

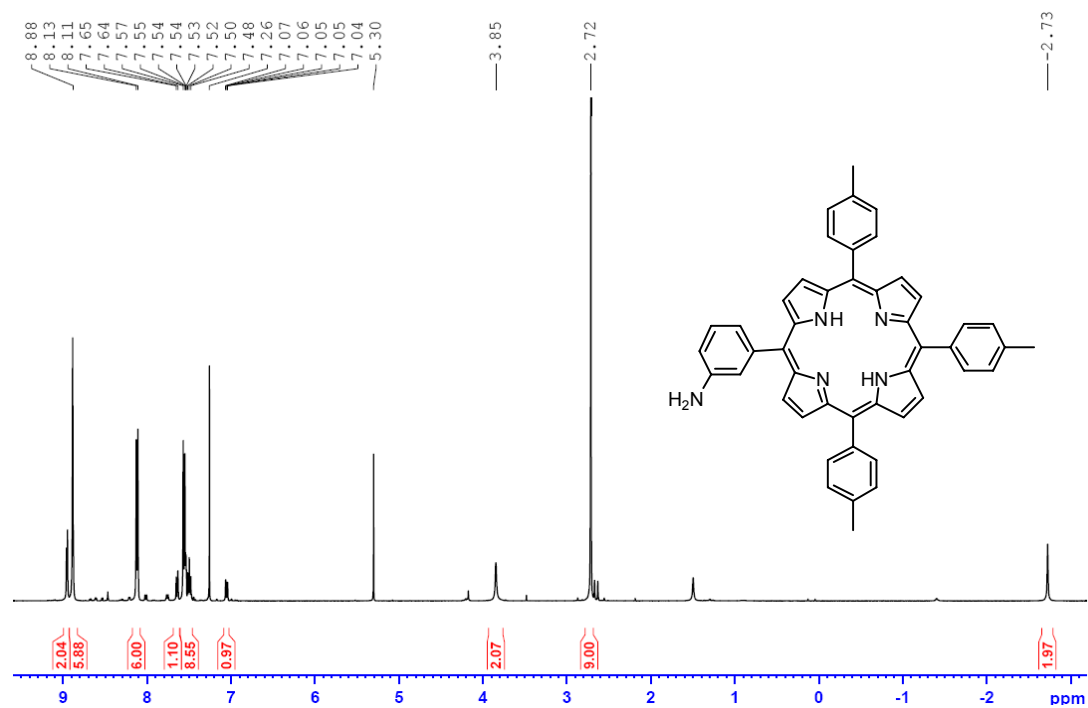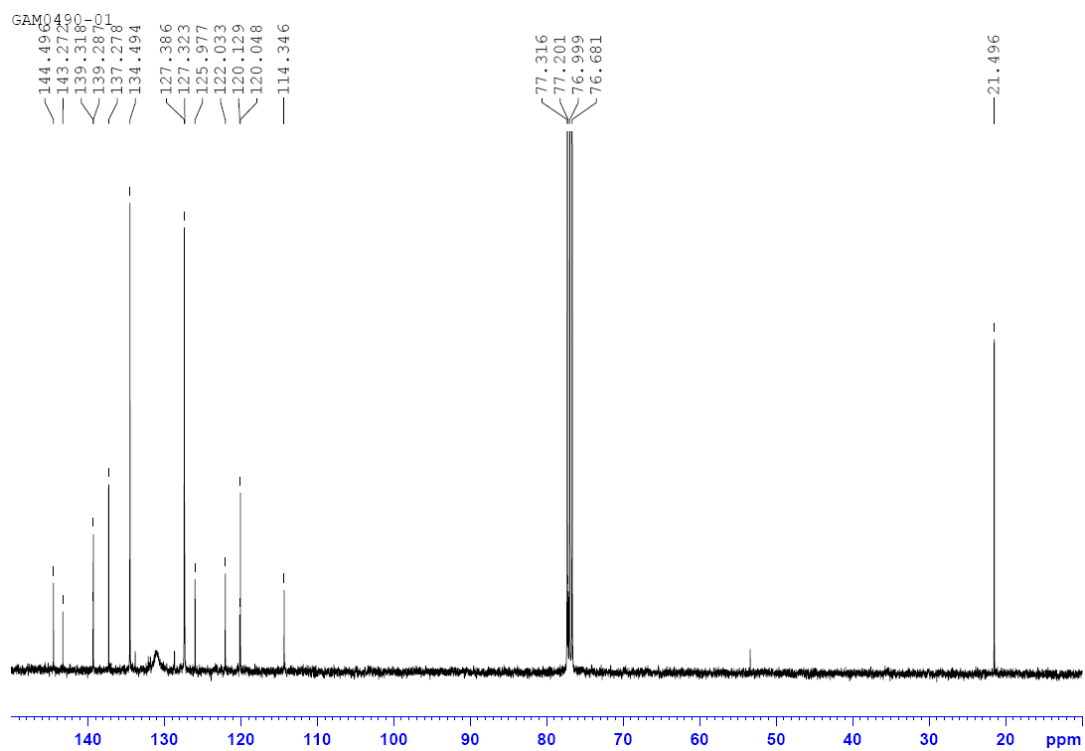

*5,10,15-[tris(4-tolyl)]-20-(3-phenylfumaramide)porphyrin ethyl ester (7)*

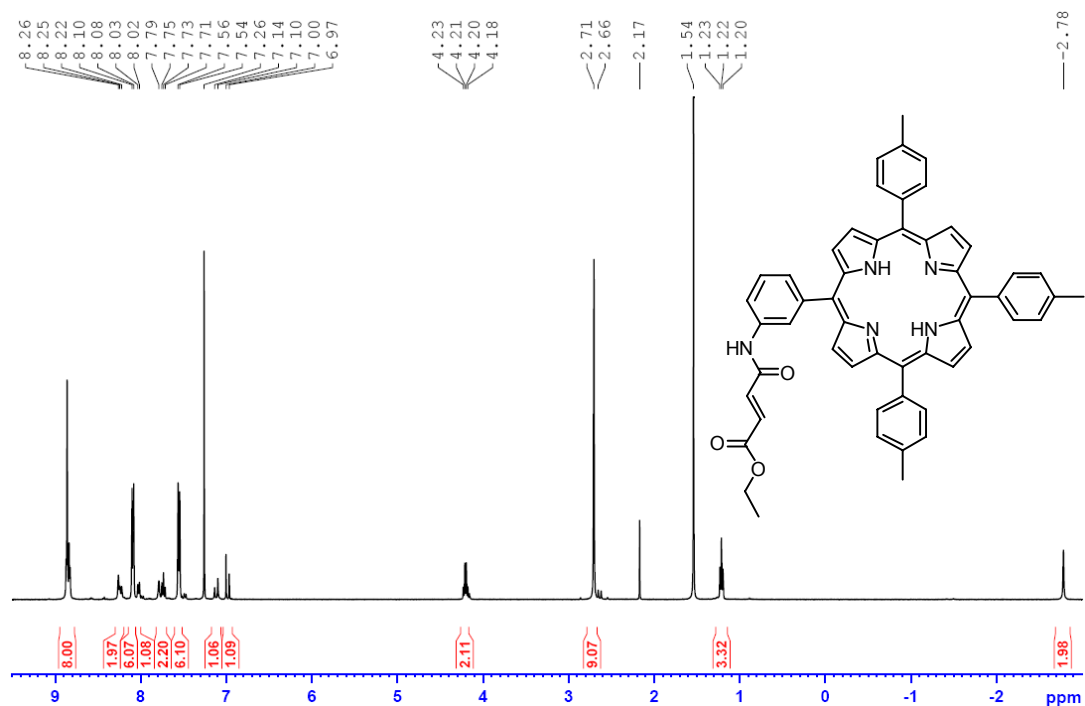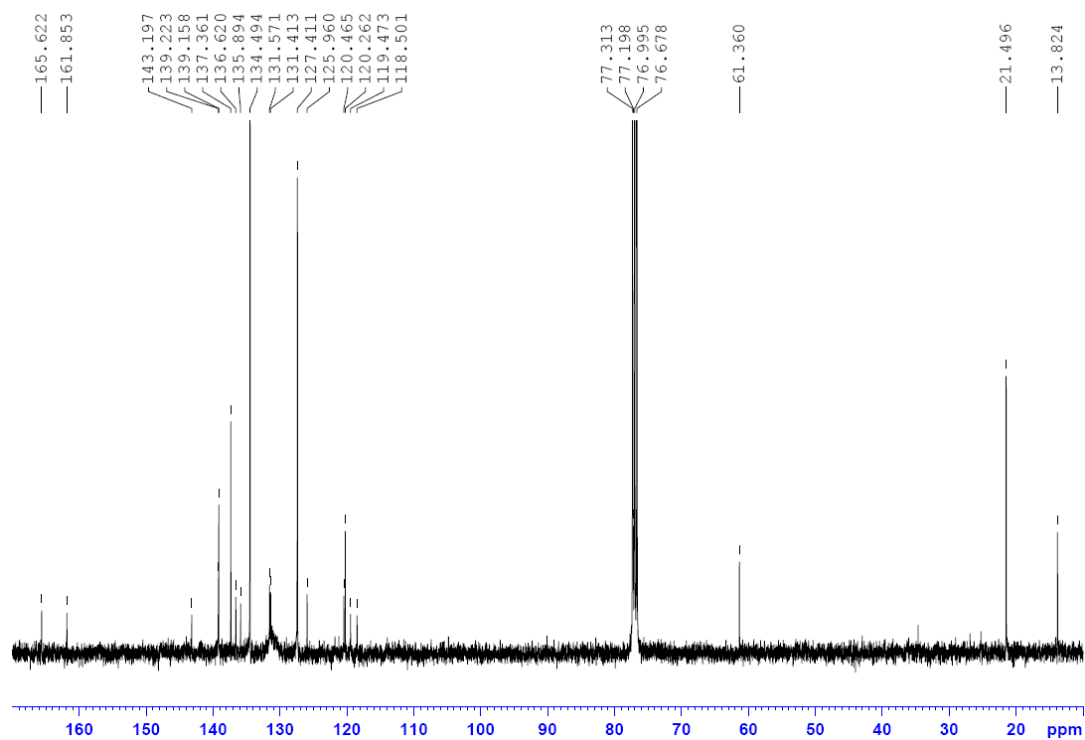

*5,10,15-[tris(4-tolyl)]-20-(3-phenylfumaramide) zinc(II) porphyrin ethyl ester (8)*

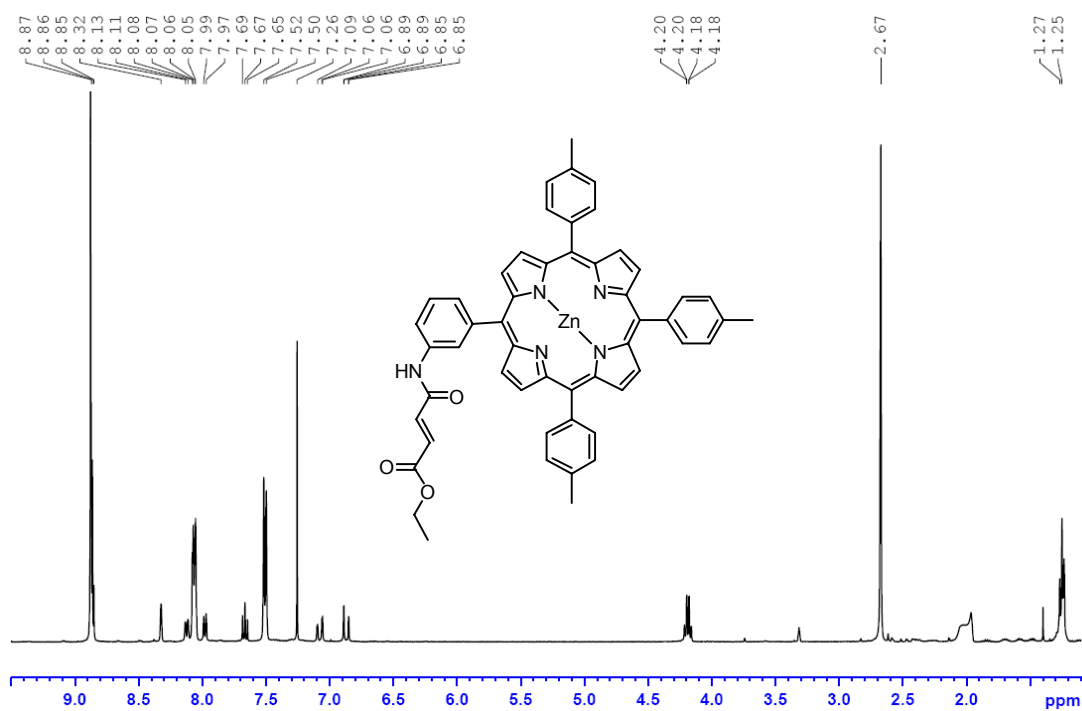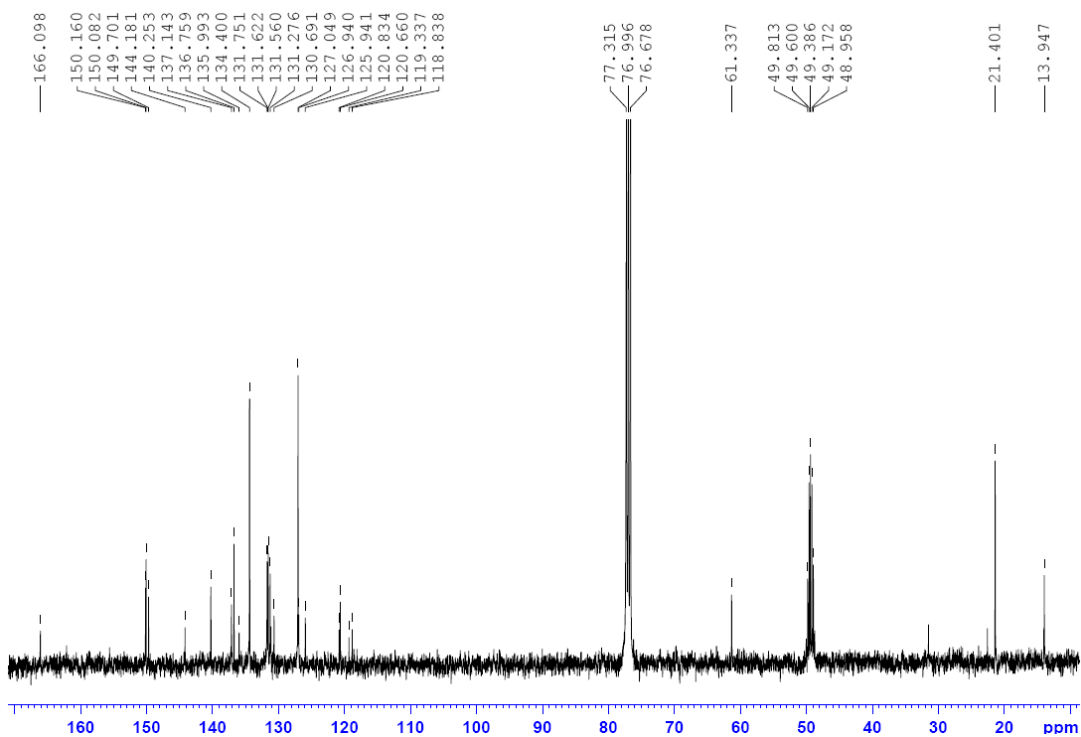

*5,10,15*-[tris(4-tolyl)]-20-(3-phenylfumaramide) zinc(II) porphyrin (2)

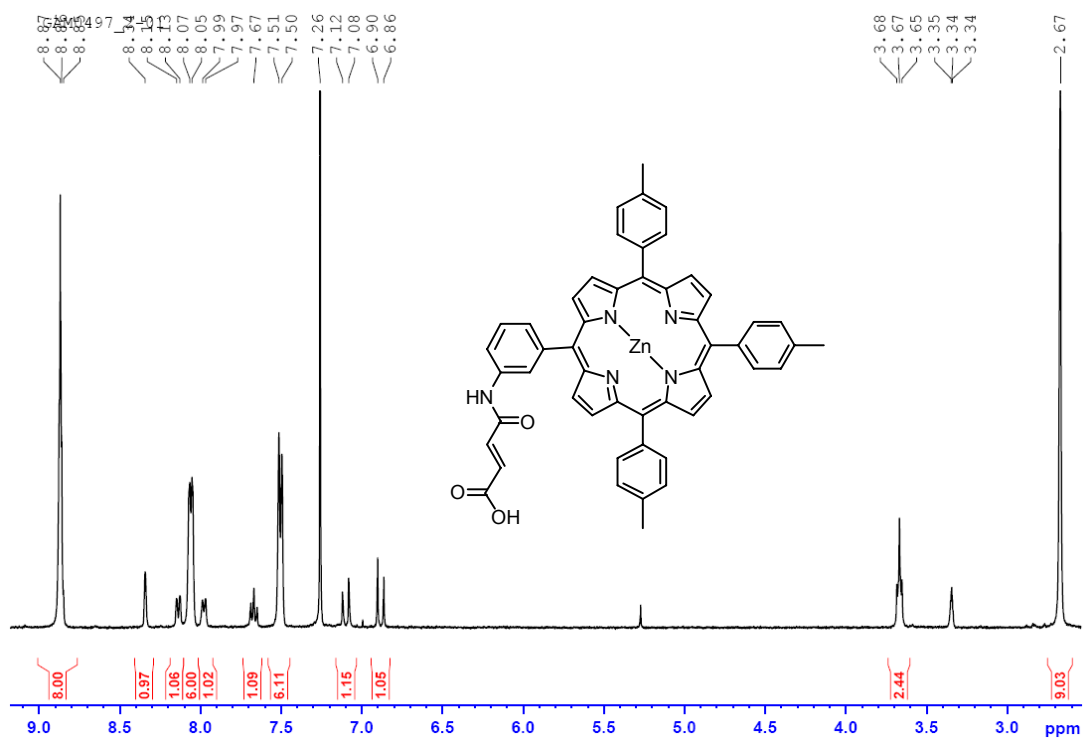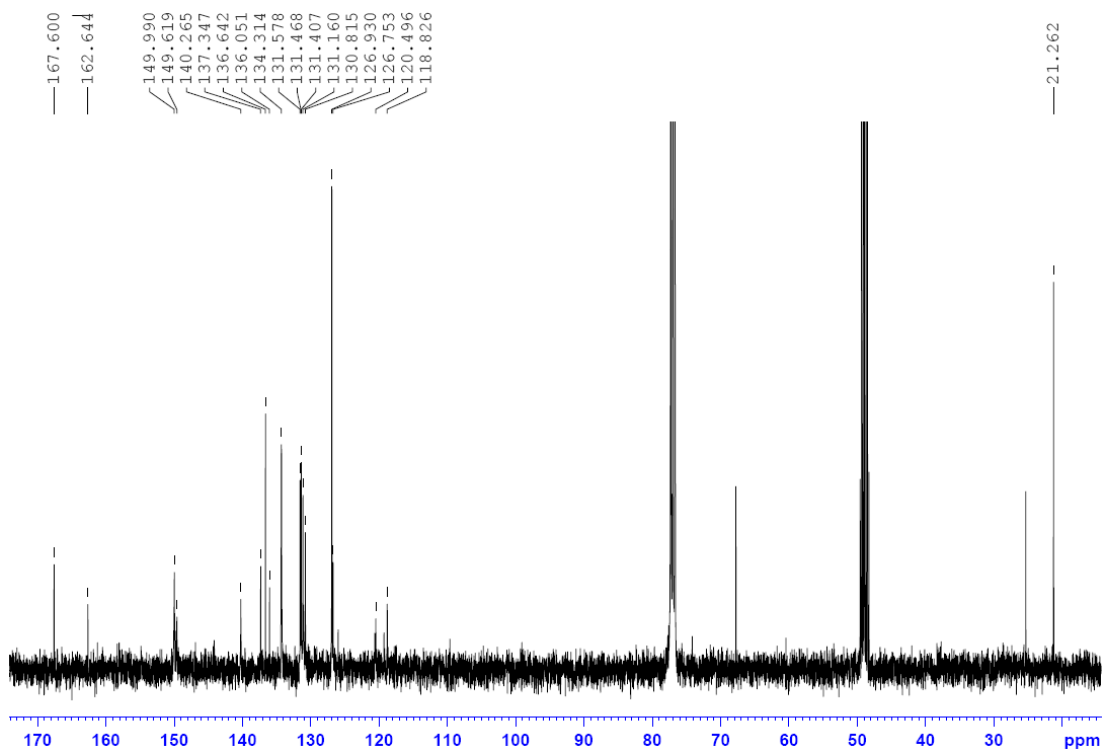



## 2D NMR-Spectra [1-2]<sub>n</sub>

### COSY

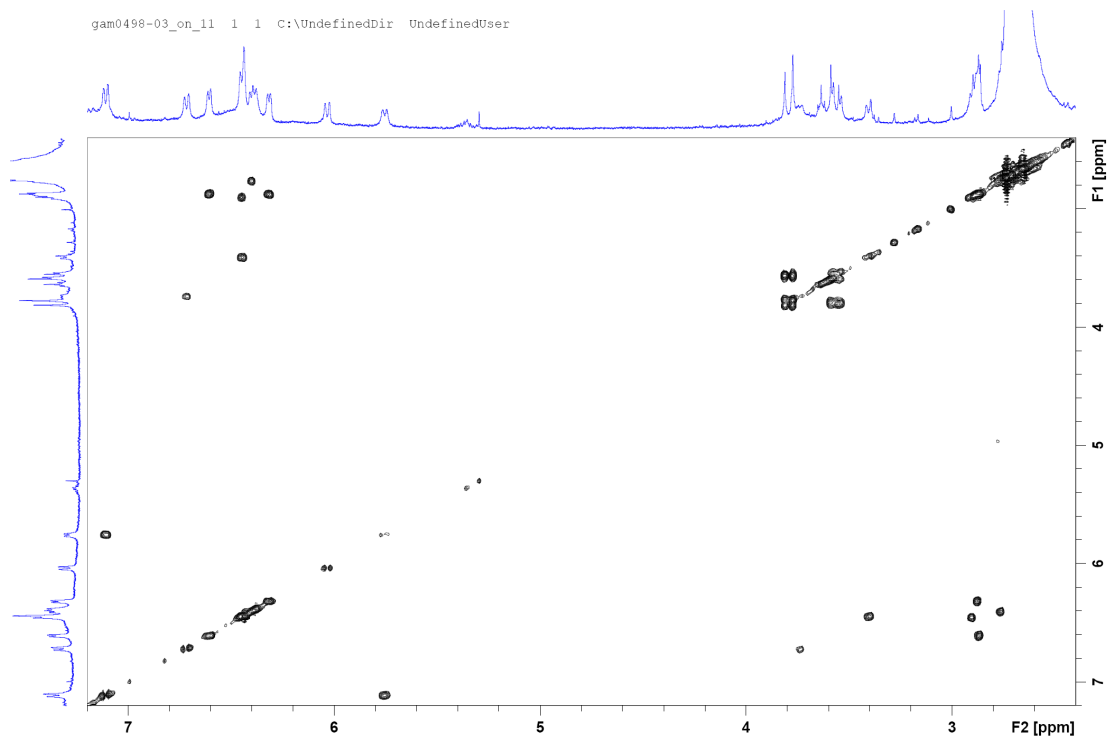

### NOESY

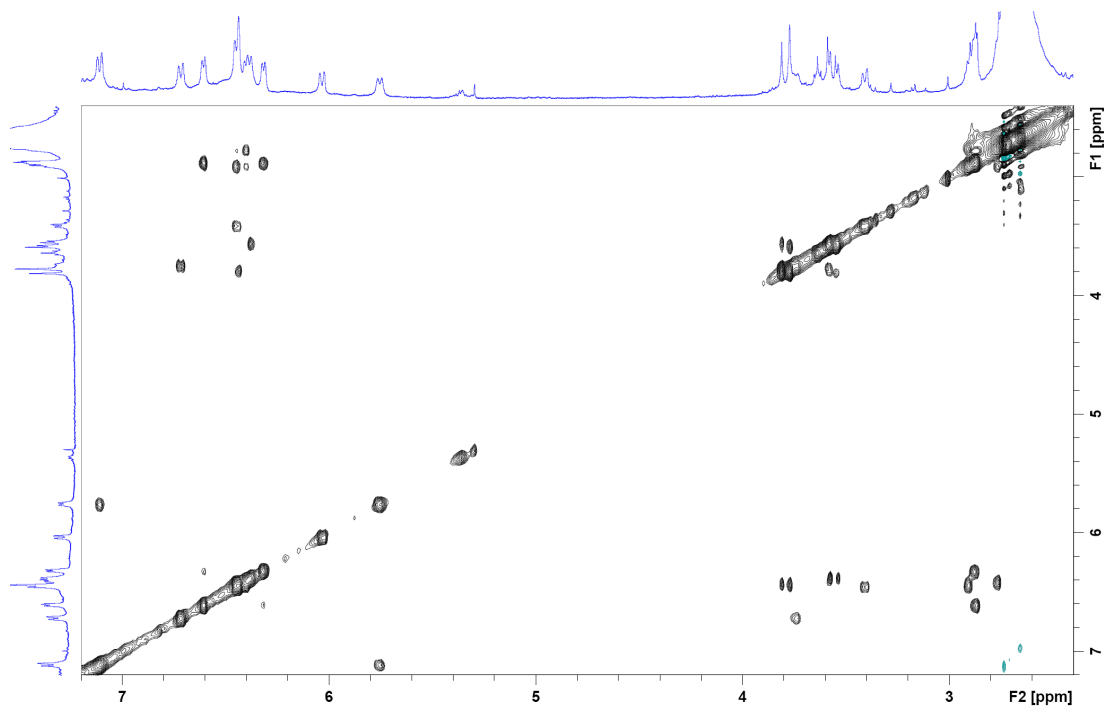

## ROESY

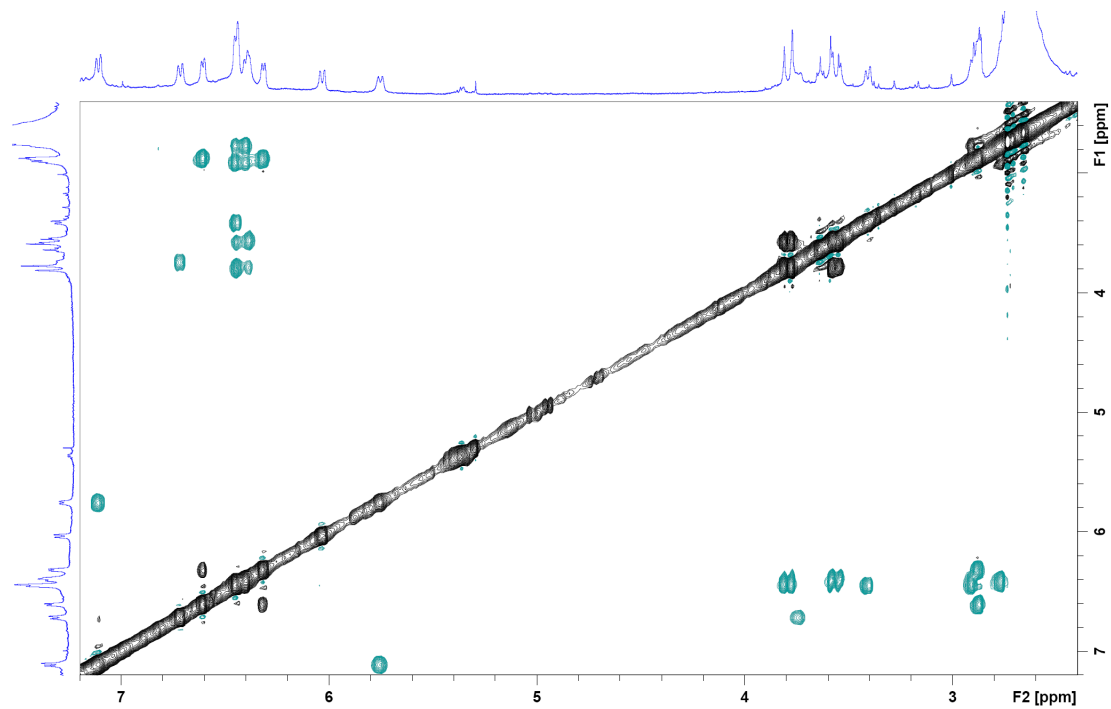

Supplement: b902408p.pdf [file b902408p.pdf]
